# Supplementary material
Source: publisher figshare collection journal article supplement (https://frontiersin.figshare.com/ndownloader/files/16218929)

# Group Distances

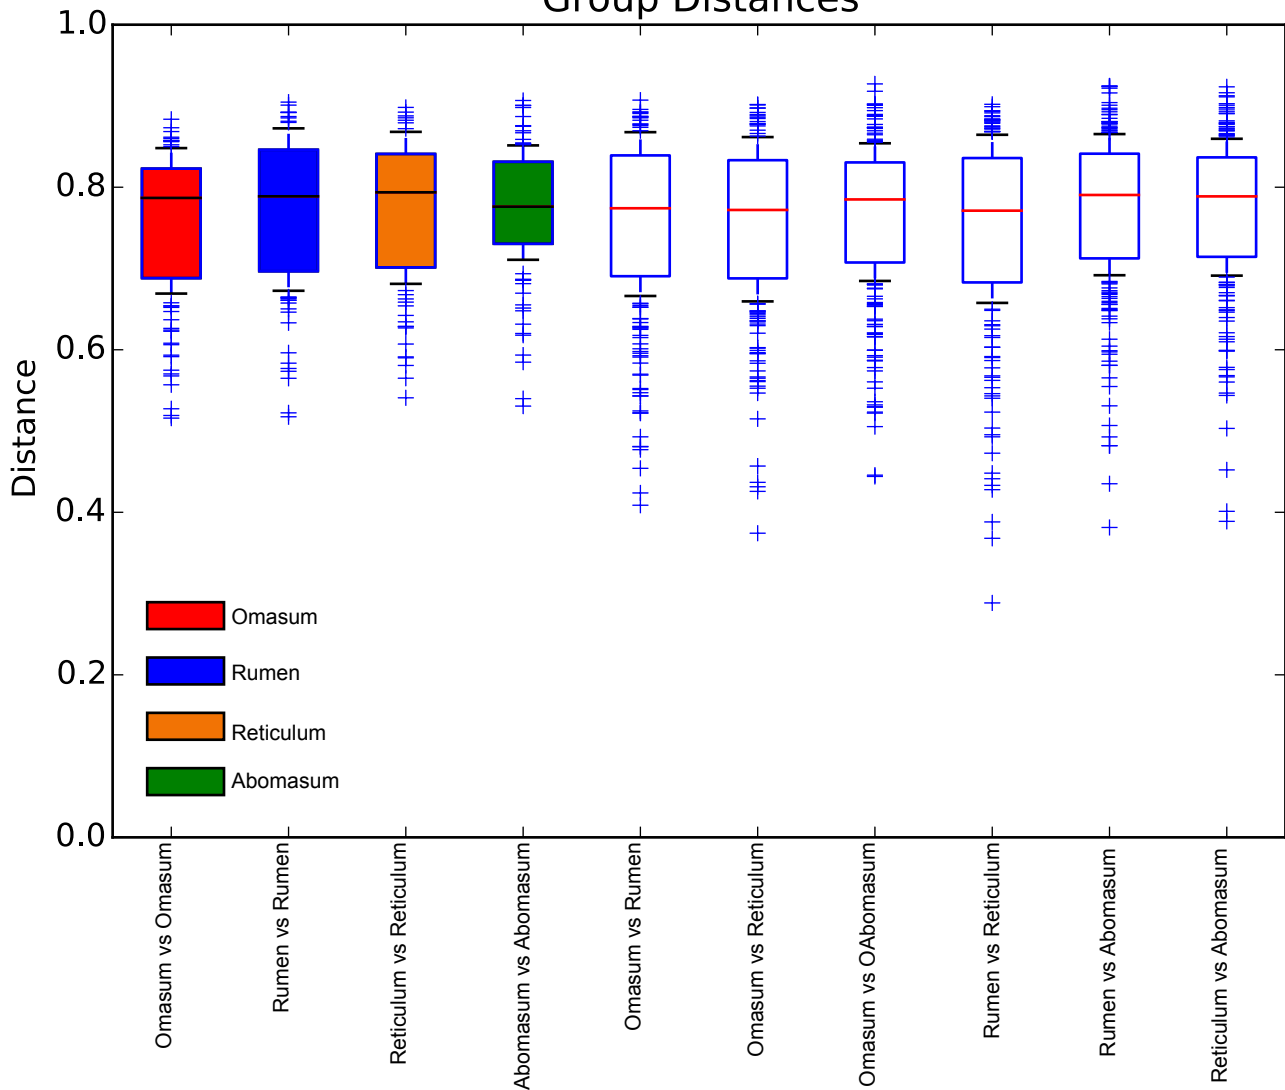

Supplement: Supplementary file [file 16218929]
